# Supplementary material for: The role of mental health problems and common psychotropic drug treatments in accidental injury at work: a case–control study
Source: HighWire-hosted journal article supplement (doi:10.1136/oemed-2013-101948), 2014-03-13
Supplement: oemed-2013-101948supp.pdf [file oemed-2013-101948supp.pdf]

**PROPOSED FOR ONLINE PRESENTATION ONLY**

**Table S1: Relation between consultation with an occupational injury and consultation for mental illness, more than 12 months before that injury**

| Consultation before the index date | Cases<br>N (%) | Controls<br>N (%) | OR*  | 95 % CI     | P-value | Attributable fraction<br>in the exposed |
|------------------------------------|----------------|-------------------|------|-------------|---------|-----------------------------------------|
| No mental health consultation      | 966 (71.7)     | 5188 (78.0)       | 1    | (reference) |         |                                         |
| Consulted with:                    |                |                   |      |             |         |                                         |
| Any psychiatric condition          | 345 (25.6)     | 1308 (19.7)       | 1.45 | (1.25-1.67) | <0.001  | 31.0%                                   |
| Psychosis                          | 119 (8.8)      | 456 (6.9)         | 1.32 | (1.06-1.65) | 0.012   | 24.2%                                   |
| Schizophrenia                      | 3 (0.2)        | 19 (0.3)          | 0.74 | (0.22-2.50) | 0.63    | -                                       |
| Neurosis                           | 261 (19.4)     | 1006 (15.1)       | 1.38 | (1.18-1.63) | <0.001  | 27.5%                                   |
| Personality problem                | 33 (2.5)       | 124 (1.9)         | 1.30 | (0.88-1.93) | 0.19    | 23.1%                                   |
| Other mental health condition      | 48 (3.6)       | 147 (2.2)         | 1.67 | (1.19-2.36) | 0.003   | 40.1%                                   |

\* Adjusted for problem drinking

**Table S2: Relation between consultation with an occupational injury and being prescribed an antidepressant hypnotic, or anxiolytic drug in the previous 12 months**

| Prescription of an antidepressant, hypnotic, or anxiolytic drug in the 12 months before the index date | Cases<br>(n=1348)<br>N (%) | Controls<br>(n=6652)<br>N (%) | OR*  | 95 % CI     | P-value | Attributable fraction in the exposed |
|--------------------------------------------------------------------------------------------------------|----------------------------|-------------------------------|------|-------------|---------|--------------------------------------|
| None of these drugs                                                                                    | 982 (72.8)                 | 5336 (80.2)                   | 1    | (reference) |         |                                      |
| At least one of these drugs                                                                            | 174 (12.9)                 | 628 (9.4)                     | 1.44 | (1.20-1.73) | <0.001  | 30.5%                                |
| Prescribed                                                                                             |                            |                               |      |             |         |                                      |
| - Antidepressants                                                                                      | 111 (8.2)                  | 450 (6.8)                     | 1.25 | (1.00-1.56) | 0.054   | 20.0%                                |
| - Hypnotics                                                                                            | 80 (5.9)                   | 240 (3.6)                     | 1.69 | (1.30-2.20) | <0.001  | 40.8%                                |
| - Anxiolytics                                                                                          | 54 (4.0)                   | 144 (2.2)                     | 1.90 | (1.37-2.63) | <0.001  | 47.4%                                |

\* Adjusted for problem drinking

**Table S3: Risks by external cause of accident and type of injury**

|                                                                   | Cases<br>(%) | Controls<br>(%) | OR*  | 95 % CI   | P-value |
|-------------------------------------------------------------------|--------------|-----------------|------|-----------|---------|
| <b>Mental health diagnosis (before the index date)</b>            |              |                 |      |           |         |
| Accidents involving a power tool or machinery                     | 33.3         | 24.6            | 1.60 | 1.12-2.27 | 0.009   |
| Chemical or other burns                                           | 32.5         | 21.1            | 1.51 | 1.02-2.23 | 0.035   |
| Chemical poisonings or inhalation injuries                        | 34.9         | 22.7            | 1.97 | 1.30-2.98 | 0.001   |
| Sprains or soft tissue injuries                                   | 26.8         | 22.7            | 1.28 | 0.94-1.74 | 0.12    |
| Lacerations or open wounds                                        | 23.6         | 24.3            | 0.94 | 0.58-1.53 | 0.80    |
| <b>Prescribed psychotropic medication (before the index date)</b> |              |                 |      |           |         |
| Accidents involving a power tool or machinery                     | 31.8         | 23.8            | 1.53 | 1.08-2.18 | 0.018   |
| Chemical or other burns                                           | 29.9         | 22.5            | 1.52 | 1.01-2.30 | 0.047   |
| Chemical poisonings or inhalation injuries                        | 31.5         | 18.3            | 2.25 | 1.47-4.34 | <0.001  |
| Sprains or soft tissue injuries                                   | 26.4         | 19.9            | 1.52 | 1.11-2.09 | 0.009   |
| Lacerations or open wounds                                        | 27.6         | 20.3            | 1.56 | 0.97-2.53 | 0.067   |

\* Adjusted for problem drinking

**APPENDIX 1: Codes supplied to the GPRD and used to define a work-related injury consultation (not all of these codes were found in the 8,000 subjects finally analysed)**

| <b>Codes</b> | <b>Accident/Injury</b>                                                    |
|--------------|---------------------------------------------------------------------------|
| L 5250W      | Accident at work                                                          |
| T 920        | Accident on duty                                                          |
| T01x000      | Train collision with other vehicle, railway employee injured              |
| T01y000      | Train collision with other object, railway employee injured               |
| T020000      | Derailed by track problem, no collision, employee injured                 |
| T031000      | Train accident involving fire, railway employee injured                   |
| T032000      | Train accident involving burning, railway employee injured                |
| T04z000      | Fall in, on or from train NOS, railway employee injured                   |
| T050000      | Crushed by rolling stock - railway employee                               |
| T051000      | Knocked down by rolling stock - railway employee                          |
| T053000      | Killed by rolling stock - railway employee                                |
| T05z000      | Injured by rolling stock, NOS - railway employee                          |
| T0x2000      | Injured by object set in motion by train - railway employee               |
| T0x3000      | Train hit by falling object - railway employee injured                    |
| T402200      | Fall from burning ship - crew of other watercraft injured                 |
| T40z600      | Other watercraft accident - docker or stevedore injured                   |
| T410200      | Burned while ship on fire, crew of other watercraft injured               |
| T410600      | Burned while ship on fire, docker or stevedore injured                    |
| T411200      | Crushed-ships in collision - crew of other watercraft inj                 |
| T411600      | Crushed-ships in collision - docker or stevedore injured                  |
| T413200      | Fall due to watercraft accident - crew other watercraft injured           |
| T413600      | Fall due to watercraft accident - docker or stevedore injured             |
| T414200      | Watercraft accident -hit by object - crew of other watercraft inj         |
| T41z200      | Accident to watercraft and inj nos – crew of other watercraft             |
| T41z600      | Accident to watercraft and injury nos – docker or stevedore               |
| T421600      | Submersion-fall overboard - docker or stevedore injured                   |
| T42z200      | Submers+water transport acc NOS - crew other watercraft injured           |
| T431200      | Fall-ladder water transport - crew other watercraft injured               |
| T473600      | Crushed-ship+static object NOS - docker or stevedore injured              |
| T474600      | Crushed between ships-no WTA - docker or stevedore injured                |
| T500200      | Aircraft collision-takeoff - crew comm aircraft surf/s injury             |
| T505800      | Aircraft fire on landing - ground crew/airline employee injury            |
| T50y200      | Acc aircraft-takeoff NOS - crew comm aircraft surf/s injured              |
| T510200      | Collision aircraft-flying+other aircraft-crew comm aircraft surf/s injury |
| T511800      | Collision aircraft-flying+bird - ground crew/air employee injury          |
| T512800      | Collision aircraft-flying+other object- ground crew/air employee injury   |
| T51z200      | Aircraft accident NOS - crew comm aircraft surf/surf injured              |
| T530200      | Accident boarding aircraft – crew comm. Aircraft su                       |
| T530800      | Accident boarding aircraft – ground crew/airline e                        |
| T531200      | Accident alighting aircraft – crew comm. Aircraft surf                    |
| T531800      | Accident alighting aircraft – ground crew/airline emp                     |

|         |                                                                       |
|---------|-----------------------------------------------------------------------|
| T532800 | Fall in aircraft - ground crew or airline employee injured            |
| T53z100 | Aircraft fall NOS - occupant of military aircraft injured             |
| T543800 | Aircraft rotating propeller injury- ground crew/airline employ injury |
| T54z200 | Other air transport acc NOS- crew comm aircraft surf/s injury         |
| T71..00 | Place of occurrence of accident or poisoning, farm (P)                |
| T710.00 | Place of occurrence of accident or poisoning, farm building           |
| T71z.00 | Place of occurrence of accident or poisoning, farm NOS (P)            |
| T72..00 | Place of occurrence of accident or poisoning, mine or quarry          |
| T722.00 | Place of accident or poisoning, tunnel under construction             |
| T72z.00 | Place of accident or poisoning, mine or quarry NOS                    |
| T73..00 | Place of accident or poisoning, industrial place/premises             |
| T733.00 | Place of accident or poisoning, factory building                      |
| T735.00 | Place of accident or poisoning, garage, place of work                 |
| T736.00 | Place of accident or poisoning, industrial yard                       |
| T7y5.00 | Place of occurrence of accident or poisoning, dock                    |
| TD15500 | Burning caused by conflagration in factory                            |
| TD18500 | Hit by object falling from burning factory                            |
| TD19000 | Jump from burning barn                                                |
| TD1y600 | Other accident resulting from fire in farm outbuilding                |
| TD65.00 | Accident caused by brazier in other structure or building             |
| TD66.00 | Accident caused by furnace in other structure or building             |
| TE01.00 | Accidents due to heat of man-made origin (P)                          |
| TE01000 | Accident due to heat in boiler room                                   |
| TE01100 | Accident due to heat in drying room                                   |
| TE01200 | Accident due to heat in factory                                       |
| TE01300 | Accident due to heat generated in transport vehicle                   |
| TE11.00 | Accidents due to cold of man-made origin (P)                          |
| TE11000 | Accidents due to dry ice                                              |
| TE11100 | Accidents due to liquid air                                           |
| TE11300 | Accidents due to liquid nitrogen (P)                                  |
| TE11400 | Accidents due to deep freeze unit (P)                                 |
| TE11z00 | Accident due to cold of man-made cold origin nos (P)                  |
| TE21000 | Accident due to sudden air pressure change, aircraft – ascent (P)     |
| TE22100 | Accident due to reduction air pressure - ascent from diving (P)       |
| TE22112 | Accident due to reduction air pressure-surfacing from diving (P)      |
| TE2yz00 | Accident due to other cause of air pressure change NOS (P)            |
| TF03200 | Accidental drowning/submersion during placement fishing nets          |
| TF03500 | Accidental drowning/submersion during underwater repairs              |
| TG30000 | Accidentally burned by machinery (P)                                  |
| TG30500 | Accidentally drowned by machinery                                     |
| TG4y400 | Accident caused by lathe turnings                                     |
| TG80200 | Accidental burning or scalding caused by liquid me                    |
| TG80200 | Accidental burning or scalding caused by liquid metal                 |
| TG81000 | Accidental burning caused by acid                                     |
| TG81011 | Accidental burning by hydrofluoric acid                               |
| TG81100 | Accidental burning caused by ammonia                                  |

|          |                                                                                        |
|----------|----------------------------------------------------------------------------------------|
| TG81400  | Accidental burning caused by vitriol burning                                           |
| TG81500  | Accidental burning caused by hydrofluoric acid                                         |
| TG81500  | Accidental burning caused by hydrofluoric acid                                         |
| TG81y00  | Accidental burning caused by other caustic or corrosive (P)                            |
| TG81z00  | Accidental burning caused by caustic or corrosive (P)                                  |
| TG8y200  | Accidental burning caused by steam pipe                                                |
| TG8y300  | Accidental burning or scalding caused by bitumen oil                                   |
| TG8y400  | Accidental burning or scalding caused by plastic                                       |
| TG92.00  | Accidents caused by industrial electric current                                        |
| TG92z00  | Accident caused by industrial electric current nos                                     |
| TO5z000  | Injured by rolling stock, nos – railway employee                                       |
| TOx2000  | Injured by object set in motion by train – railway                                     |
| U112500  | [X]Striking against/struck by other object occ trade/service area                      |
| U113600  | [X]Caught crushed jammed/pinched in/between obj ectocc industrial/construction area    |
| U11C600  | [X]Handgun discharge occurrence at industrial/construction area                        |
| U11E600  | [X]Discharge from other/unspecified firearm occurrence at industrial/construction area |
| U11Q700  | [X]Foreign body entering into/thro eye/natural orifice occurrence on farm              |
| U13z600  | [X]Unspecified drowning+submersion occurrence industrial/construction area             |
| U150.12  | [X]Electric shock - transmission line                                                  |
| U164700  | [X]Exposure to ignition of high flammable material occurrence farm                     |
| T45..00  | Machinery accident in water transport (WT)                                             |
| T450.00  | Injury in water transport caused by deck machinery                                     |
| T450600  | WT injury-deck machinery - docker or stevedore injured                                 |
| T450y00  | WT injury-deck machinery - other specified person injured                              |
| T451y00  | WT injury-engine room machine - other specified person inj                             |
| T453200  | WT injury-laundry machinery - crew other watercraft injured                            |
| T453600  | WT injury-laundry machinery - docker or stevedore injured                              |
| T454.00  | Injury in water transport caused by loading machines                                   |
| T454600  | WT injury-loading machinery - docker or stevedore injured                              |
| T45zy00  | WT machinery accident NOS - other specified person injured                             |
| TD3y000  | Accident caused by clothes on fire from blowlamp                                       |
| TD3y100  | Accident caused by clothes on fire from blowtorch                                      |
| TD3y900  | Accident caused by clothes on fire from welding torch                                  |
| TDyy000  | Accident caused by blowlamp                                                            |
| TDyy100  | Accident caused by blowtorch                                                           |
| TG22. 00 | Accidentally caught in hand tool, appliance or imp                                     |
| TG25.00  | Accidentally caught under packing crate due to losing grip                             |
| TG3..00  | Accidents caused by machinery                                                          |
| TG30000  | Accidentally burned by machinery                                                       |
| TG30100  | Accidentally caught in machinery                                                       |
| TG30200  | Accident caused by collapse of machinery                                               |
| TG30300  | Accidentally crushed by machinery                                                      |
| TG30500  | Accidentally drowned by machinery                                                      |
| TG30700  | Accident caused by fall into moving part of machine                                    |
| TG30800  | Accident caused by fall from a moving part of machine                                  |

|         |                                                            |
|---------|------------------------------------------------------------|
| TG30C00 | Accident caused by overturning of machinery                |
| TG30D00 | Accidentally pinned under machinery                        |
| TG30F00 | Accidentally struck by machinery                           |
| TG30z00 | Accident caused by machinery nos                           |
| TG31.00 | Accidents caused by agricultural machines                  |
| TG31000 | Accident caused by animal powered agricultural machine     |
| TG31100 | Accident caused by hay derrick                             |
| TG31400 | Accident caused by forging machine                         |
| TG31500 | Accident caused by hay rake                                |
| TG31z00 | Accident caused by agricultural machinery nos              |
| TG32000 | Accident caused by land bore or drill                      |
| TG32200 | Accident caused by drilling shaft hoist                    |
| TG32200 | Accident caused by drilling shaft hoist                    |
| TG32300 | Accident caused by drilling shaft lift                     |
| TG32400 | Accident caused by drilling under-cutter                   |
| TG32z00 | Accident caused by mining or earth drilling machinery NOS  |
| TG33.00 | Accidents caused by lifting machines and appliances        |
| TG33000 | Accident caused by chain hoist                             |
| TG33300 | Accident caused by grain elevator                          |
| TG33700 | Accident caused by pulley block                            |
| TG33800 | Accident caused by winch                                   |
| TG34.00 | Accidents caused by metalworking machines                  |
| TG34000 | Accident caused by abrasive wheel                          |
| TG34100 | Accident caused by forging machine                         |
| TG34200 | Accident caused by lathe                                   |
| TG34300 | Accident caused by mechanical shears                       |
| TG34500 | Accident caused by metal milling machine                   |
| TG34600 | Accident caused by metal power press                       |
| TG34800 | Accident caused by metal sawing machine                    |
| TG34z00 | Accident caused by metalworking machine nos                |
| TG35.00 | Accidents caused by woodworking and forming machines       |
| TG35000 | Accident caused by band saw                                |
| TG35100 | Accident caused by bench saw                               |
| TG35200 | Accident caused by circular saw                            |
| TG35300 | Accident caused by moulding machine                        |
| TG35500 | Accident caused by powered saw                             |
| TG35600 | Accident caused by radial saw                              |
| TG35700 | Accident caused by sander                                  |
| TG35z00 | Accident caused by woodworking or forming machine          |
| TG36.00 | Accidents caused by prime movers, except electrical motors |
| TG36100 | Accident caused by internal combustion engine              |
| TG36200 | Accident caused by steam engine                            |
| TG37.00 | Accidents caused by transmission machinery                 |
| TG37000 | Accident caused by transmission belt                       |
| TG37200 | Accident caused by transmission chain                      |
| TG37300 | Accident caused by transmission gear                       |

|          |                                                                              |
|----------|------------------------------------------------------------------------------|
| TG37400  | Accident caused by transmission pinion                                       |
| TG37500  | Accident caused by transmission pulley                                       |
| TG37600  | Accident caused by transmission shaft                                        |
| TG38200  | Accident caused by steam shovel                                              |
| TG3y000  | Accident caused by machine for manufacture of clothes                        |
| TG3y100  | Accident caused by machine for manufacture of food/beverages                 |
| TG3y200  | Accident caused by machine for manufacture of paper                          |
| TG3y300  | Accident caused by printing machine                                          |
| TG3y500  | Accident caused by spinning machine                                          |
| TG3y500  | Accident caused by weaving machine                                           |
| TG3y700  | Accident caused by textile machine                                           |
| TG3z. 00 | Accident caused by machinery nos                                             |
| TG3z.11  | Industrial machinery accident NOS                                            |
| TG41000  | Accident caused by powered drill (P)                                         |
| TG41200  | Accident caused by powered hedge clipper (P)                                 |
| TG41300  | Accident caused by powered rivet gun                                         |
| TG41400  | Accident caused by powered snow blower                                       |
| TG41500  | Accident caused by powered staple gun (P)                                    |
| TG42400  | Accident caused by electric sewing machine (P)                               |
| TG44. 00 | Accident caused by other hand tools and implements (P)                       |
| TG44200  | Accident caused by chisel (P)                                                |
| TG44400  | Accident caused by hand saw (P)                                              |
| TG44500  | Accident caused by hoe (P)                                                   |
| TG44800  | Accident caused by paper cutter (P)                                          |
| TG44900  | Accident caused by pitchfork (P)                                             |
| TG44A00  | Accident caused by rake (P)                                                  |
| TG44C00  | Accident caused by screwdriver (P)                                           |
| TG44E00  | Accident caused by shovel (P)                                                |
| TG44z00  | Accident caused by hand tool or implement nos (P)                            |
| TG92100  | Accident caused by industrial electrical control apparatus                   |
| TG92200  | Accident caused by industrial electrical equipment+machines                  |
| TGA2300  | Overexposure to oxygas welding torch                                         |
| U119500  | [X]Cont with other powered hand tool+household machine trade/service area    |
| U11Az00  | [X]Contact with agricultural machinery occurrenceat unspecified place        |
| U11B500  | [X]Contact with other+unspecified machinery occurrence at trade/service area |
| U11B700  | [X]Contact with other+unspecified machinery occurrence on farm               |
| T602.00  | Accident involving battery powered mail trucks                               |
| T603.00  | Accident involving coal car in mine                                          |
| T604.00  | Accident involving logging car                                               |
| T605.00  | Accident involving industrial self propelled truck                           |
| T60E.00  | Fall from powered vehicle, industrial or commercial                          |
| TD66.00  | Accident caused by furnace in other structure or B                           |
| TG30A00  | Accidental mechanical suffocation caused by machine                          |
| TG30E00  | Accidentally run over by machinery                                           |
| TG30G00  | Accidentally thrown from machinery                                           |
| TG31000  | Accident caused by animal powered agricultural machine                       |



|         |                                                                           |
|---------|---------------------------------------------------------------------------|
| TG31200 | Accident caused by farm tractor                                           |
| TG31300 | Accident caused by harvester                                              |
| TG31400 | Accident caused by hay mower                                              |
| TG31600 | Accident caused by reaper                                                 |
| TG31700 | Accident caused by thresher                                               |
| TG32.00 | Accidents caused by mining and earth-drilling machines                    |
| TG32100 | Accident caused by seabed bore or drill                                   |
| TG32z00 | Accident caused by mining or earth drilling machine                       |
| TG33.00 | Accidents caused by lifting machine and appliances                        |
| TG33100 | Accident caused by crane                                                  |
| TG33200 | Accident caused by Derrick                                                |
| TG33500 | Accident caused by forklift truck                                         |
| TG33z00 | Accident caused by lifting machine or appliance no                        |
| TG34700 | Accident caused by metal rolling-mill                                     |
| TG36000 | Accident caused by gas turbine                                            |
| TG36300 | Accident caused by water driven turbine                                   |
| TG38.00 | Accident caused by earth moving/excavation machine                        |
| TG38000 | Accident caused by bulldozer                                              |
| TG38100 | Accident caused by road scraper                                           |
| TG91000 | Accident caused by electric power generating plant                        |
| TG91100 | Accident caused by electric power distribution station                    |
| TG92000 | Accident caused by industrial electrical conductor                        |
| TG92300 | Accident caused by industrial electrical transformer                      |
| U083500 | [X]Driver of special industrial vehicle injury in non-traffic accident    |
| U084500 | [X]Driver of special agricultural vehicle injured in non-traffic accident |
| U085000 | [X]Driver of special construction vehicle injured in traffic accident     |
| SM11.00 | Benzine causing toxic effect                                              |
| SM23000 | Tetrachloroethylene causing toxic effect                                  |
| SM23100 | Trichloroethylene causing toxic effect                                    |
| SM30100 | Cresol causing toxic effect                                               |
| SM32200 | Sodium hydroxide causing toxic effect (P)                                 |
| SM4.00  | Lead and lead compounds causing toxic effect                              |
| SM40100 | Lead salts causing toxic effect                                           |
| SM41100 | Tetraethyl lead causing toxic effect                                      |
| SM5.00  | Other metals causing toxic effect (P)                                     |
| SM55.00 | Cadmium causing toxic effect                                              |
| SM5y100 | Copper salts causing toxic effect                                         |
| SM78.00 | Toxic effect of fluorine gas and hydrogen fluoride                        |
| T470.00 | Accidental poisoning by gases or fumes on ship                            |
| T470200 | Accidental poison gas/fume on ship – crew other watercraft                |
| T470600 | Accidental poison gas/fume on ship – docker or stevedor                   |
| T822z00 | Accidental poisoning by bromine compounds nos                             |
| T903.00 | Accidental poisoning by isopropyl alcohol                                 |
| T903300 | Accidental poisoning by secondary propyl alcohol                          |
| T904.00 | Accidental poisoning by fusel oil                                         |
| T910.00 | Accidental poisoning by synthetic detergents and s (P)                    |

|         |                                                              |
|---------|--------------------------------------------------------------|
| T911.00 | Accidental poisoning by soap products (P)                    |
| T912.00 | Accidental poisoning by polishes (P)                         |
| T913.00 | Accidental poisoning by other cleaning agents (P)            |
| T913000 | Accidental poisoning by scouring agents (P)                  |
| T916.00 | Accidental poisoning by other paints and varnishes (P)       |
| T916200 | Accidental poisoning by non-lead paints (P)                  |
| T916300 | Accidental poisoning by white washes (P)                     |
| T916z00 | Accidental poisoning by paint or varnish nos (P)             |
| T920.00 | Accidental poisoning by petroleum solvents (P)               |
| T920200 | Accidental poisoning by petroleum naphtha                    |
| T921000 | Accidental poisoning by antiknock additives to pet           |
| T921200 | Accidental poisoning by petrol (P)                           |
| T921300 | Accidental poisoning by kerosene (P)                         |
| T922.00 | Accidental poisoning by lubricating oils (P)                 |
| T924.00 | Accidental poisoning by other solvents (P)                   |
| T924000 | Accidental poisoning by benzene                              |
| T92z.00 | Accidental poisoning by solvent nos (P)                      |
| T93..00 | Accidental poisoning by agricultural chemical prep           |
| T930.00 | Accidental poisoning by organochlorine insecticides          |
| T930000 | Accidental poisoning by benzene hexachlorine                 |
| T930100 | Accidental poisoning by chlordane                            |
| T930100 | Accidental poisoning by chlordane                            |
| T930300 | Accidental poisoning by dieldrin                             |
| T930400 | Accidental poisoning by endrine                              |
| T930500 | Accidental poisoning by toxaphene                            |
| T931000 | Accidental poisoning by demeton                              |
| T931100 | Accidental poisoning by diazino                              |
| T931400 | Accidental poisoning by Methyl Parathion                     |
| T931400 | Accidental poisoning by methyl parathion                     |
| T931700 | Accidental poisoning by phorate                              |
| T931800 | Accidental poisoning by phosdrin                             |
| T931z00 | Accidental poisoning by organophosphorous insecticide        |
| T932.00 | Accidental poisoning by carbamates                           |
| T932000 | Accidental poisoning by aldicarb                             |
| T932100 | Accidental poisoning by carbaryl                             |
| T932200 | Accidental poisoning by propoxur                             |
| T932z00 | Accidental poisoning by carbamates nos                       |
| T933.00 | Accidental poisoning by mixtures of insecticides (P)         |
| T934000 | Accidental poisoning by insecticides of kerosene compounds   |
| T934z00 | Accidental poisoning by insecticides nos (P)                 |
| T935.00 | Accidental poisoning by herbicides (P)                       |
| T935000 | Accidental poisoning by 2, 4-D                               |
| T935300 | Accidental poisoning by diquat                               |
| T935400 | Accidental poisoning by mixtures of herbicides and plant (P) |
| T935500 | Accidental poisoning by paraquat                             |
| T935z00 | Accidental poisoning by herbicides nos (P)                   |

|         |                                                              |
|---------|--------------------------------------------------------------|
| T936000 | Accidental poisoning by organic mercurials                   |
| T936100 | Accidental poisoning by pentachlorophenol                    |
| T937.00 | Accidental poisoning by rodenticides (P)                     |
| T937200 | Accidental poisoning by thallium                             |
| T937400 | Accidental poisoning by zinc phosphide                       |
| T937z00 | Accidental poisoning by rodenticides nos (P)                 |
| T938000 | Accidental poisoning by cyanides                             |
| T938100 | Accidental poisoning by methyl bromide                       |
| T938200 | Accidental poisoning by phosphine                            |
| T93z.00 | Accidental poisoning agricultural chemical preparation       |
| T940.00 | Accidental poisoning by corrosive aromatics                  |
| T940000 | Accidental poisoning by carbolic acid                        |
| T940011 | Accidental poisoning by phenol                               |
| T940z00 | Accidental poisoning by corrosive aromatics NOS              |
| T941000 | Accidental poisoning by hydrochloric acid                    |
| T941100 | Accidental poisoning by nitric acid                          |
| T941200 | Accidental poisoning by sulphuric acid                       |
| T941z00 | Accidental poisoning by acid nos                             |
| T942.00 | Accidental poisoning by caustic alkalis (P)                  |
| T942000 | Accidental poisoning by sodium hydroxide (P)                 |
| T942z00 | Accidental poisoning by caustic alkalis nos (P)              |
| T94y.00 | Accidental poisoning by other corrosives and caustics (P)    |
| T94z.00 | Accidental poisoning by corrosives and caustic no (P)        |
| T960.00 | Accidental poisoning by lead and its compounds and fumes     |
| T960000 | Accidental poisoning by lead, unspecified                    |
| T960z00 | Accidental poisoning by lead, NOS                            |
| T961.00 | Accidental poisoning by mercury and its compounds and fumes  |
| T961000 | Accidental poisoning by mercury, unspecified                 |
| T962.00 | Accidental poisoning by antimony and its compounds and fumes |
| T963.00 | Accidental poisoning by arsenic and its compounds            |
| T963000 | Accidental poisoning by arsenic, unspecified                 |
| T963100 | Accidental poisoning by arsenic compounds                    |
| T963200 | Accidental poisoning by arsenic fumes                        |
| T963z00 | Accidental poisoning by arsenic, nos                         |
| T964.00 | Accidental poisoning by other metals + compounds and fumes   |
| T964000 | Accidental poisoning by beryllium and its compound           |
| T964200 | Accidental poisoning by cadmium and its compounds            |
| T964300 | Accidental poisoning by copper salts                         |
| T964500 | Accidental poisoning by manganese and its compounds          |
| T964600 | Accidental poisoning by nickel compounds                     |
| T964700 | Accidental poisoning by thallium compounds                   |
| T964z00 | Accidental poisoning by metals and compounds and fumes       |
| T965000 | Accidental poisoning by plant food (P)                       |
| T965100 | Accidental poisoning by fertilisers (P)                      |
| T966y00 | Accidental poisoning by other adhesives (P)                  |
| T980100 | Accidental poisoning by butane                               |

|         |                                                               |
|---------|---------------------------------------------------------------|
| T980200 | Accidental poisoning by propane                               |
| T981000 | Accidental poisoning by acetylene                             |
| T981100 | Accidental poisoning by water gas                             |
| T981z00 | Accidental poisoning by utility gas nos                       |
| T982000 | Accidental poisoning by exhaust gas-stationary far            |
| T982100 | Accidental poisoning by exhaust gas from gas engine           |
| T982200 | Accidental poisoning by exhaust gas from motor pump           |
| T98y.00 | Accidental poisoning by carbon monoxide from other (P)        |
| T98y000 | Accidental poisoning by CO – blast furnace gas                |
| T98y100 | Accidental poisoning by CO – kiln vapour                      |
| T98yz00 | Accidental poisoning by carbon monoxide from other source (P) |
| T99..00 | Accidental poisoning by other gases and vapours               |
| T99..00 | Accidental poisoning by other gases/vapours                   |
| T991.00 | Accidental poisoning by sulphur dioxide                       |
| T992.00 | Accidental poisoning by freon                                 |
| T99y000 | Accidental poisoning by chlorine                              |
| T99y100 | Accidental poisoning by hydrocyanic acid gas                  |
| TD10500 | Explosion caused by conflagration in factory                  |
| TD12000 | Carbon monoxide fumes from conflagration in barn              |
| TD13600 | Fumes NOS from conflagration in farm outbuilding              |
| TD13A00 | Fumes NOS from conflagration in store                         |
| TD14500 | Smoke NOS from conflagration in factory                       |
| TD16000 | Accident due to collapse of burning barn                      |
| TD16500 | Accident due to collapse of burning factory                   |
| TD16600 | Accident due to collapse of burning farm outbuilding          |
| TD17000 | Accident due to fall from burning barn                        |
| TD17500 | Accident due to fall from burning factory                     |
| TD17600 | Accident due to fall from burning farm outbuilding            |
| TG30600 | Accident caused by explosion of, on or in machine             |
| TG5..00 | Accidents caused by explosion of pressure vessel              |
| TG51.00 | Accident caused by explosion of gas cylinder                  |
| TG51z00 | Accident caused by explosion of gas cylinder                  |
| TG5z.00 | Accident caused by explosion of pressure vessel NOS           |
| TG71.00 | Accident caused by blasting materials                         |
| TG71000 | Accident caused by blasting cap                               |
| TG71100 | Accident caused by detonator                                  |
| TG71200 | Accident caused by dynamite                                   |
| TG71300 | Accident caused by blasting explosive nos                     |
| TG71z00 | Accident caused by blasting material nos                      |
| TG72000 | Accident caused by explosion of acetylene                     |
| TG72300 | Accident caused by explosion of fire damp                     |
| TG72500 | Accident caused by explosion of methane                       |
| TG72600 | Accident caused by explosion of propane                       |
| TG72y00 | Accident caused by explosion in mine nos                      |
| TG7y.00 | Accident caused by other explosive materials                  |
| TG7y300 | Accident caused by explosion of mine                          |

|         |                                                                   |
|---------|-------------------------------------------------------------------|
| TG7Y700 | Accident caused by explosion of munitions factory                 |
| TG81000 | Accidental burning caused by acid                                 |
| TG81011 | Accidental burning by Hydrofluoric acid                           |
| TG81500 | Accidental burning caused by hydrofluoric acid                    |
| TG8y300 | Accidental burning or scalding caused by bitumen or tar           |
| U11M500 | [X]Exposure to high-pressure jet occurrence at trade/service area |
| U11M700 | [X]Exposure to high-pressure jet, occurrence on farm              |

*P – Possibly occupational; nos – Not otherwise specified*

## **APPENDIX 2: Mental health consultations before the index event**

| <i>Med code</i> | <i>Read code</i> | <i>Read term</i>                                       |
|-----------------|------------------|--------------------------------------------------------|
| NEUROSIS        |                  |                                                        |
| 276             | E28..00          | Acute reaction to stress                               |
| 1131            | E204.00          | Neurotic depression reactive type                      |
| 543             | Eu32z11          | [X]Depression NOS                                      |
| 636             | E200.00          | Anxiety states                                         |
| 131             | 1B13.00          | Anxiousness                                            |
| 1996            | 1B17.00          | Depressed                                              |
| 1900            | R2y3.00          | [D]Debility, unspecified                               |
| 966             | E207.00          | Hypochondriasis                                        |
| 3208            | E203.00          | Obsessive-compulsive disorders                         |
| 22019           | Eu42100          | [X]Predominantly compulsive acts [obsessional rituals] |
| 2030            | E203100          | Obsessional neurosis                                   |
| 1908            | 2257             | O/E - depressed                                        |
| 23354           | E201z00          | Hysteria NOS                                           |
| 21836           | Eu42.12          | [X]Obsessive-compulsive neurosis                       |
| 7953            | Eu34100          | [X]Dysthymia                                           |
| 655             | E200300          | Anxiety with depression                                |
| 4537            | 1B1B.11          | C/O - insomnia                                         |
| 2524            | 1BK..00          | Worried                                                |
| 4824            | 1B17.11          | C/O - feeling depressed                                |
| 1758            | E200400          | Chronic anxiety                                        |
| 462             | E200111          | Panic attack                                           |
| 514             | 1B12.12          | Tension - nervous                                      |
| 4639            | Eu32.00          | [X]Depressive episode                                  |
| 1582            | E205.11          | Nervous exhaustion                                     |
| 2100            | R060100          | [D]Hyperventilation                                    |
| 4069            | E200100          | Panic disorder                                         |
| 5902            | 1B13.11          | Anxiousness - symptom                                  |
| 4863            | 28B..00          | O/E - easily distractable                              |
| 3586            | 1B12.11          | Nerves                                                 |
| 1712            | 1BD1.00          | Suicidal ideation                                      |
| 3667            | 1B15.00          | Irritable                                              |
| 19696           | Eu33.12          | [X]Recurrent episodes of psychogenic depression        |

|       |         |                                                            |
|-------|---------|------------------------------------------------------------|
| 1149  | 225A.00 | O/E - irritable                                            |
| 3881  | 1B16.00 | Agitated                                                   |
| 2913  | 1B...00 | Nervous system symptoms                                    |
| 4534  | E200z00 | Anxiety state NOS                                          |
| 1449  | 1B1J.00 | Emotional problem                                          |
| 3502  | 1B1J.11 | Emotional upset                                            |
| 4167  | E202A00 | Fear of flying                                             |
| 1533  | E290.00 | Brief depressive reaction                                  |
| 4659  | E200200 | Generalised anxiety disorder                               |
| 2147  | 1B1N.00 | Poor self esteem                                           |
| 2300  | E202000 | Phobia unspecified                                         |
| 16638 | E202.11 | Social phobic disorders                                    |
| 12838 | E202200 | Agoraphobia without mention of panic attacks               |
| 791   | E20z.11 | Nervous breakdown                                          |
| 2930  | 1B17.12 | C/O - feeling unhappy                                      |
| 4143  | E201612 | Globus hystericus                                          |
| 9211  | Eu32100 | [X]Moderate depressive episode                             |
| 8205  | Eu41000 | [X]Panic disorder [episodic paroxysmal anxiety]            |
| 5385  | Eu41.00 | [X]Other anxiety disorders                                 |
| 9536  | 1B1D.11 | Nightmares - symptom                                       |
| 21305 | 1B1B.00 | Cannot sleep - insomnia                                    |
| 3076  | E202100 | Agoraphobia with panic attacks                             |
| 8215  | R00zA00 | [D]Physical violence                                       |
| 8851  | Eu33.11 | [X]Recurrent episodes of depressive reaction               |
| 9785  | Eu40200 | [X]Specific (isolated) phobias                             |
| 9581  | Eu50200 | [X]Bulimia nervosa                                         |
| 1907  | E202.00 | Phobic disorders                                           |
| 15431 | E201600 | Other conversion disorder                                  |
| 19129 | 1B1H.00 | Frightened                                                 |
| 29520 | Eu33100 | [X]Recurrent depressive disorder, current episode moderate |
| 1525  | E22z.00 | Psychosexual disorder NOS                                  |
| 2585  | 1B14.11 | Tenseness - symptom                                        |
| 5719  | 1B1L.00 | Stress related problem                                     |
| 5305  | E206.00 | Depersonalisation syndrome                                 |
| 5811  | 1B16.11 | Agitated - symptom                                         |
| 3361  | E205.00 | Neurasthenia - nervous debility                            |
| 4171  | Eu43100 | [X]Post - traumatic stress disorder                        |
| 3292  | Eu33.00 | [X]Recurrent depressive disorder                           |
| 2775  | E290000 | Grief reaction                                             |
| 4067  | 1BD3.00 | Suicidal plans                                             |
| 10344 | Eu41100 | [X]Generalized anxiety disorder                            |
| 2826  | E29..00 | Adjustment reaction                                        |
| 13122 | 225B.00 | O/E - angry                                                |
| 2970  | Eu32z00 | [X]Depressive episode, unspecified                         |
| 13124 | 2258    | O/E - anxious                                              |
| 9386  | Eu40.00 | [X]Phobic anxiety disorders                                |

|       |         |                                                              |
|-------|---------|--------------------------------------------------------------|
| 8408  | 1B1C.00 | Sexual symptom                                               |
| 11913 | Eu41200 | [X]Mixed anxiety and depressive disorder                     |
| 2777  | R2y3.11 | [D] Self neglect                                             |
| 2509  | R2y2.00 | [D]Nervousness                                               |
| 7724  | R00z800 | [D]Irritability and anger                                    |
| 21431 | Eu46z11 | [X]Neurosis NOS                                              |
| 11336 | Eu43200 | [X]Adjustment disorders                                      |
| 52161 | Eu44.12 | [X]Conversion reaction                                       |
| 5589  | 1BD4.00 | Suicide risk                                                 |
| 8123  | 1B1O.00 | Restless                                                     |
| 4634  | E200500 | Recurrent anxiety                                            |
| 34696 | E201400 | Hysterical paralysis                                         |
| 11602 | Eu40100 | [X]Social phobias                                            |
| 7222  | Eu40z11 | [X]Phobia NOS                                                |
| 5249  | E20..00 | Neurotic disorders                                           |
| 2366  | E202C00 | Dental phobia                                                |
| 23808 | Eu4..00 | [X]Neurotic, stress - related and somoform disorders         |
| 25638 | Eu41z11 | [X]Anxiety NOS                                               |
| 6939  | E200000 | Anxiety state unspecified                                    |
| 14780 | E20z.00 | Neurotic disorder NOS                                        |
| 4269  | E201700 | Hysterical amnesia                                           |
| 29608 | 1B12.00 | Nerves - nervousness                                         |
| 1694  | 284..00 | O/E - disorientated                                          |
| 9944  | E202.12 | Phobic anxiety                                               |
| 2831  | 1B1I.00 | Crying, excessive                                            |
| 15321 | E20y000 | Somatization disorder                                        |
| 20163 | 1B1H.12 | Apprehension                                                 |
| 2571  | Eu40000 | [X]Agoraphobia                                               |
| 14729 | E202z00 | Phobic disorder NOS                                          |
| 18399 | Eu42200 | [X]Mixed obsessional thoughts and acts                       |
| 3291  | Eu32z12 | [X]Depressive disorder NOS                                   |
| 23838 | Eu41z00 | [X]Anxiety disorder, unspecified                             |
| 6142  | 1B15.11 | Irritable - symptom                                          |
| 28302 | E292312 | Specific work inhibition                                     |
| 9504  | 1B19.11 | Suicidal - symptom                                           |
| 15437 | 1B19.00 | Suicidal                                                     |
| 1723  | E202800 | Claustrophobia                                               |
| 12635 | Eu40214 | [X]Simple phobia                                             |
| 16817 | E2D..00 | Disturbance of emotion specific to childhood and adolescence |
| 6583  | Eu50211 | [X]Bulimia NOS                                               |
| 7899  | 2253    | O/E - distressed                                             |
| 8902  | Eu33.13 | [X]Recurrent episodes of reactive depression                 |
| 9055  | Eu32.11 | [X]Single episode of depressive reaction                     |
| 5304  | Eu42.00 | [X]Obsessive - compulsive disorder                           |
| 16729 | Eu40011 | [X]Agrophobia without history of panic disorder              |

|       |         |                                                        |
|-------|---------|--------------------------------------------------------|
| 22136 | Eu44.00 | [X]Dissociative [conversion] disorders                 |
| 11717 | Eu32000 | [X]Mild depressive episode                             |
| 5347  | 1B1H.11 | Fear                                                   |
| 7737  | Eu34113 | [X]Neurotic depression                                 |
| 10734 | E290011 | Bereavement reaction                                   |
| 6159  | Eu50.00 | [X]Eating disorders                                    |
| 8584  | Eu34111 | [X]Depressive neurosis                                 |
| 7604  | Eu32.13 | [X]Single episode of reactive depression               |
| 11098 | Eu43.00 | [X]Reaction to severe stress, and adjustment disorders |
| 4597  | 1B1B200 | Late insomnia                                          |
| 2188  | E201.00 | Hysteria                                               |
| 6408  | Eu41011 | [X]Panic attack                                        |
| 20089 | 1B1Z.00 | General nervous symptom NOS                            |
| 7412  | 1BJ..00 | Loss of confidence                                     |
| 15220 | Eu34114 | [X]Persistent anxiety depression                       |
| 11607 | Eu43000 | [X]Acute stress reaction                               |
| 10290 | Eu34112 | [X]Depressive personality disorder                     |
| 5225  | E2D2z11 | School refusal                                         |
| 9686  | E2...00 | Neurotic, personality and other nonpsychotic disorders |
| 15008 | 1BZ..00 | Nervous system symptoms NOS                            |
| 10723 | R2y2.12 | [D]Nervous tension                                     |
| 20245 | E283000 | Acute situational disturbance                          |
| 15631 | 1BF..00 | Guilty ideas                                           |
| 26138 | E28z.00 | Acute stress reaction NOS                              |
| 34064 | Eu40z00 | [X]Phobic anxiety disorder, unspecified                |
| 20802 | E28z.12 | Flying phobia                                          |
| 3347  | E2D..11 | Adolescent - emotional problem                         |
| 5406  | E2D3000 | Sibling jealousy                                       |
| 10535 | Eu43012 | [X]Acute reaction to stress                            |
| 18248 | Eu40212 | [X]Animal phobias                                      |
| 35825 | Eu41112 | [X]Anxiety reaction                                    |
| 7819  | E274.00 | Non-organic sleep disorders                            |

#### PERSONALITY DISORDER

|       |         |                                      |
|-------|---------|--------------------------------------|
| 15098 | E21z.00 | Personality disorder NOS             |
| 1363  | E2C..11 | Behaviour disorder                   |
| 18565 | E21y200 | Borderline personality disorder      |
| 4515  | E216.00 | Inadequate personality disorder      |
| 27481 | E215.00 | Histrionic personality disorders     |
| 2076  | E21..00 | Personality disorders                |
| 1329  | E2C1200 | Tantrums                             |
| 2040  | E2C0.00 | Aggressive unsocial conduct disorder |
| 792   | E21z.11 | Psychopathic personality             |
| 23597 | E213.00 | Explosive personality disorder       |
| 6416  | E2C0100 | Anger reaction                       |
| 5652  | E210.00 | Paranoid personality disorder        |
| 20255 | E2C3100 | Pathological gambling                |



|                  |         |                                                          |
|------------------|---------|----------------------------------------------------------|
| 6104             | 13HP.00 | Relationship problems                                    |
| 2641             | E2C0000 | Aggressive outburst                                      |
| 6339             | E213.11 | Aggressive personality                                   |
| 4885             | E2C1011 | School refusal                                           |
| 4759             | E215.11 | Hysterical personality disorders                         |
| 34881            | Eu62y11 | [X]Chronic pain personality syndrome                     |
| 3111             | 13HP100 | Girlfriend relationship problem                          |
| 3709             | E215200 | Emotionally unstable personality                         |
| 27945            | Eu60411 | [X]Hysterical personality disorder                       |
| 42496            | Eu60z00 | [X]Personality disorder, unspecified                     |
| 35763            | E21y300 | Passive-aggressive personality disorder                  |
| 7169             | E2Cy000 | Breath holder                                            |
| 2235             | E2C..00 | Disturbance of conduct NEC                               |
| 4531             | 13HP000 | Boyfriend relationship problem                           |
| 1293             | E214100 | Obsessional personality                                  |
| 11121            | Eu91215 | [X]Truancy from school                                   |
| 1364             | E21y500 | Immature personality disorder                            |
| 19931            | E216.13 | Labile personality                                       |
| 3165             | Eu63300 | [X]Trichotillomania                                      |
| 23521            | E2Cz000 | Juvenile delinquency unspecified                         |
| 20033            | E21yz11 | Manipulative personality                                 |
| 12228            | E211100 | Hypomanic personality disorder                           |
| 21665            | E216.12 | Dependent personality                                    |
| 14979            | E211.00 | Affective personality disorder                           |
| 17721            | E2Cz.00 | Unspecified disturbance of conduct                       |
| 4911             | E2Cy.00 | Other conduct disturbances                               |
| <b>PSYCHOSIS</b> |         |                                                          |
| 324              | E2B..00 | Depressive disorder NEC                                  |
| 1055             | E135.00 | Agitated depression                                      |
| 5879             | E112.11 | Agitated depression                                      |
| 6950             | E112.13 | Endogenous depression first episode                      |
| 6482             | E113700 | Recurrent depression                                     |
| 1713             | 2841    | Confused                                                 |
| 4843             | Eu22015 | [X]Paranoia                                              |
| 14728            | E110100 | Single manic episode, mild                               |
| 3775             | E2E..00 | Childhood hyperkinetic syndrome                          |
| 2560             | E11..12 | Depressive psychoses                                     |
| 2113             | Eu22011 | [X]Paranoid psychosis                                    |
| 4323             | E2B1.00 | Chronic depression                                       |
| 6932             | E113.11 | Endogenous depression - recurrent                        |
| 5565             | E2E0.00 | Child attention deficit disorder                         |
| 16808            | Eu31000 | [X]Bipolar affective disorder, current episode hypomanic |
| 6874             | Eu31.00 | [X]Bipolar affective disorder                            |
| 3630             | E....00 | Mental disorders                                         |
| 2741             | Eu30000 | [X]Hypomania                                             |
| 1531             | Eu31.11 | [X]Manic-depressive illness                              |

|       |         |                                                           |
|-------|---------|-----------------------------------------------------------|
| 12831 | E115.11 | Manic-depressive - now depressed                          |
| 1915  | 1BH.00  | Delusions                                                 |
| 15066 | F481K00 | Visual hallucinations                                     |
| 1914  | 1B1E.00 | Hallucinations                                            |
| 12120 | R001000 | [D]Hallucinations, auditory                               |
| 4261  | E12..00 | Paranoid states                                           |
| 14965 | E13z.00 | Nonorganic psychosis NOS                                  |
| 12173 | Eu30.00 | [X]Manic episode                                          |
| 5188  | R009.00 | [D]Confusion                                              |
| 2114  | E03y300 | Unspecified puerperal psychosis                           |
| 4678  | Eu30z11 | [X]Mania NOS                                              |
| 3489  | E11z100 | Rebound mood swings                                       |
| 694   | Eu2z.11 | [X]Psychosis NOS                                          |
| 8478  | E130.00 | Reactive depressive psychosis                             |
| 6387  | E2A1000 | Mild memory disturbance                                   |
| 9521  | Eu30.11 | [X]Bipolar disorder, single manic episode                 |
| 14784 | E117.00 | Unspecified bipolar affective disorder                    |
| 24387 | Eu04.13 | [X]Acute / subacute infective psychosis                   |
| 3636  | E13z.11 | Psychotic episode NOS                                     |
| 41537 | E030z00 | Acute confusional state NOS                               |
| 14656 | E11..00 | Affective psychoses                                       |
| 4033  | E030.00 | Acute confusional state                                   |
| 24264 | Eu45213 | [X]Hypochondriacal neurosis                               |
| 595   | E112.14 | Endogenous depression                                     |
| 11994 | Eu05600 | [X]Organic emotionally labile [asthenic] disorder         |
| 12099 | Eu32300 | [X]Severe depressive episode with psychotic symptoms      |
| 9667  | Eu32200 | [X]Severe depressive episode without psychotic symptoms   |
| 15155 | E112200 | Single major depressive episode, moderate                 |
| 10610 | E112.00 | Single major depressive episode                           |
| 10239 | E2A2.00 | Post-concussion syndrome                                  |
| 5726  | Eu3..00 | [X]Mood - affective disorders                             |
| 21985 | Eu0z.11 | [X]Organic psychosis NOS                                  |
| 17770 | E130.11 | Psychotic reactive depression                             |
| 15053 | E133.00 | Acute paranoid reaction                                   |
| 3991  | 2841.11 | Confusion                                                 |
| 15099 | E113.00 | Recurrent major depressive episode                        |
| 25694 | E113300 | Recurrent major depressive episodes, severe, no psychosis |
| 16506 | E112100 | Single major depressive episode, mild                     |
| 23932 | R007z00 | [D]Malaise and fatigue NOS                                |
| 6075  | E293000 | Adjustment reaction with aggression                       |
| 9183  | E11z200 | Masked depression                                         |
| 14743 | E120.00 | Simple paranoid state                                     |
| 23835 | E040.11 | Korsakoff's non-alcoholic psychosis                       |
| 10870 | Eu45214 | [X]Hypochondriasis                                        |
| 5814  | R007z11 | [D]Lassitude                                              |
| 33751 | Eu31z00 | [X]Bipolar affective disorder, unspecified                |

|       |         |                                                              |
|-------|---------|--------------------------------------------------------------|
| 17385 | E114.11 | Manic-depressive - now manic                                 |
| 6546  | E112.12 | Endogenous depression first episode                          |
| 43324 | E112500 | Single major depressive episode, partial or unspec remission |

#### SCHIZOPHRENIA

|       |         |                                |
|-------|---------|--------------------------------|
| 854   | E10..00 | Schizophrenic disorders        |
| 3984  | E100200 | Chronic schizophrenic          |
| 8407  | E10z.00 | Schizophrenia NOS              |
| 2117  | E107.00 | Schizo-affective schizophrenia |
| 9422  | Eu25.00 | [X]Schizoaffective disorders   |
| 15733 | E100000 | Unspecified schizophrenia      |
| 1494  | E103.00 | Paranoid schizophrenia         |

#### OTHER

|       |         |                                                    |
|-------|---------|----------------------------------------------------|
| 8913  | E274800 | Night terrors                                      |
| 2129  | E274900 | Nightmares                                         |
| 2639  | E204.11 | Postnatal depression                               |
| 10717 | U2...11 | [X]Self inflicted injury                           |
| 2135  | E271.00 | Anorexia nervosa                                   |
| 4106  | 1B74.00 | Floaters seen                                      |
| 3009  | E2F0000 | Reading disorder unspecified                       |
| 927   | 1B73.00 | Flashing lights seen                               |
| 2393  | E270.00 | Stammering or stuttering                           |
| 9287  | 1B92.11 | Stammer - symptom                                  |
| 6495  | ZV40111 | [V]Problems with speech                            |
| 1366  | ZV40.11 | [V]Behavioural problems                            |
| 2017  | ZV40.13 | [V]Psychological problems                          |
| 13307 | Eu53011 | [X]Postnatal depression NOS                        |
| 2107  | 1B9..00 | Speech problem                                     |
| 9265  | Eu46100 | [X]Depersonalization - derealization syndrome      |
| 5346  | E272.00 | Tics                                               |
| 15483 | E261100 | Psychogenic cough                                  |
| 4023  | E274111 | Insomnia NOS                                       |
| 11778 | Eu23200 | [X]Acute schizophrenia-like psychotic disorder     |
| 2972  | E2B0.00 | Postviral depression                               |
| 4377  | E275100 | Bulimia (non-organic overeating)                   |
| 7743  | E275.00 | Other and unspecified non-organic eating disorders |
| 15959 | E263000 | Psychogenic pruritus                               |
| 4149  | 13HP200 | Poor family relationship                           |
| 17046 | U2...00 | [X]Intentional self-harm                           |
| 11701 | Ry16.00 | [D]Slowness and poor responsiveness                |
| 11721 | E274700 | Somnambulism - sleep walking                       |
| 12080 | 1BE1.00 | Problem situation                                  |
| 8758  | 1BE..00 | Life crisis                                        |
| 17378 | U2...14 | [X]Attempted suicide                               |
| 36946 | Eu50z00 | [X]Eating disorder, unspecified                    |
| 3869  | E264400 | Psychogenic dyspepsia                              |
| 16093 | E276.00 | Non-organic enuresis                               |

|       |         |                                              |
|-------|---------|----------------------------------------------|
| 9656  | Eu46011 | [X]Fatigue syndrome                          |
| 31014 | Ry12.00 | [D]Strange and inexplicable behaviour        |
| 14667 | ZV40300 | [V]Other behavioural problems                |
| 36992 | E274300 | Transient hypersomnia                        |
| 2871  | E264200 | Cyclical vomiting - psychogenic              |
| 2923  | 62T1.00 | Puerperal depression                         |
| 3612  | E2F..00 | Specific delays in development               |
| 15515 | E274100 | Transient insomnia                           |
| 16560 | Eu45324 | [X]Psychogenic IBS                           |
| 4963  | E264000 | Psychogenic aerophagy                        |
| 12830 | Eu45322 | [X]Psychogenic hyperventilat                 |
| 10158 | E264311 | Spurious diarrhoea                           |
| 17081 | Eu45323 | [X]Psychogenic freq micturit                 |
| 15196 | E273100 | Head-banging                                 |
| 24283 | Ry10.00 | [D]Very low level of personal hygiene        |
| 17203 | Eu50y12 | [X]Psychogenic loss of appetite              |
| 23675 | Eu5z.11 | [X]Psychogenic physiological dysfunction NOS |
| 23413 | E261400 | Psychogenic yawning                          |
| 6796  | Eu50511 | [X]Psychogenic vomiting                      |
| 8826  | Eu33.15 | [X]SAD - Seasonal affective disorder         |
| 12344 | E272300 | Gilles de la Tourette's disorder             |
| 20906 | Eu45y12 | [X]Globus hystericus                         |
| 10982 | E274311 | Hypersomnia NOS                              |
| 20053 | E261300 | Psychogenic hyperventilation                 |
| 5067  | E26z.00 | Psychosomatic disorder NOS                   |
| 33403 | 1B9Z.00 | Speech problem NOS                           |

### APPENDIX 3: Psychotropic drug treatments prescribed before the index date

| <i>Product</i> | <i>Name</i>                          | <i>Active drug</i>      | <i>BNF code</i> |
|----------------|--------------------------------------|-------------------------|-----------------|
| HYPNOTICS      |                                      |                         |                 |
| 6361002        | zopiclone tablets 3.75mg             | zopiclone               | 4010100         |
| 6358001        | ZIMOVANE tablets 7.5mg [AVENTIS]     | zopiclone               | 4010100         |
| 6361001        | zopiclone tablets 7.5mg              | zopiclone               | 4010100         |
| 7296001        | STILNOCT tablets 5mg [SANOFI S]      | zolpidem tartrate       | 4010100         |
| 6422001        | cloral betaine tablets 707mg         | cloral betaine          | 4010100         |
| 7295001        | zolpidem tablets 5mg                 | zolpidem tartrate       | 4010100         |
| 2361001        | loprazolam tablets 1mg               | loprazolam mesilate     | 4010100         |
| 2772001        | nitrazepam tablets 5mg               | nitrazepam              | 4010100         |
| 4007003        | lormetazepam capsules 1mg            | lormetazepam            | 4010100         |
| 2725001        | WELLDORM tablets 707mg [ALPHASHOW]   | cloral betaine          | 4010100         |
| 7296002        | STILNOCT tablets 10mg [SANOFI S]     | zolpidem tartrate       | 4010100         |
| 7295002        | zolpidem tablets 10mg                | zolpidem tartrate       | 4010100         |
| 4007001        | lormetazepam tablets 0.5mg           | lormetazepam            | 4010100         |
| 4007002        | lormetazepam tablets 1mg             | lormetazepam            | 4010100         |
| 4878002        | triazolam tablets 250micrograms      | triazolam               | 4010100         |
| 11725001       | SONATA capsules 5mg [MEDA]           | zaleplon                | 4010100         |
| 4878001        | triazolam tablets 125micrograms      | triazolam               | 4010100         |
| 10296001       | ZIMOVANE LS tablets 3.75mg [AVENTIS] | zopiclone               | 4010100         |
| 11724001       | zaleplon capsules 5mg                | zaleplon                | 4010100         |
| 652001         | NOCTEC capsules 500mg [SQUIBB]       | chloral hydrate         | 4010100         |
| 4279001        | nitrazepam tablets 10mg              | nitrazepam              | 4010100         |
| 11724002       | zaleplon capsules 10mg               | zaleplon                | 4010100         |
| 11725002       | SONATA capsules 10mg [MEDA]          | zaleplon                | 4010100         |
| 1925001        | triclofos elixir 500mg/5ml           | triclofos sodium        | 4010100         |
| 4278001        | nitrazepam capsules 5mg              | nitrazepam              | 4010100         |
| ANXIOLYTICS    |                                      |                         |                 |
| 5175001        | buspirone hydrochloride tablets 5mg  | buspirone hydrochloride | 4010200         |

|                                            |                                                               |                                             |         |
|--------------------------------------------|---------------------------------------------------------------|---------------------------------------------|---------|
| 3190003                                    | chlordiazepoxide tablets 5mg                                  | chlordiazepoxide<br>hydrochloride           | 4010200 |
| 3190002                                    | chlordiazepoxide capsules 10mg                                | chlordiazepoxide<br>hydrochloride           | 4010200 |
| 3191001                                    | chlordiazepoxide tablets 10mg                                 | chlordiazepoxide<br>hydrochloride           | 4010200 |
| 2986001                                    | oxazepam tablets 10mg                                         | oxazepam                                    | 4010200 |
| 3190001                                    | chlordiazepoxide capsules 5mg                                 | chlordiazepoxide<br>hydrochloride           | 4010200 |
| 6225002                                    | chlordiazepoxide hydrochloride tablets 10mg                   | chlordiazepoxide<br>hydrochloride           | 4010200 |
| 2986002                                    | oxazepam tablets 15mg                                         | oxazepam                                    | 4010200 |
| 5176001                                    | BUSPAR tablets 5mg [BRISTOL]                                  | buspirone hydrochloride                     | 4010200 |
| 5175002                                    | buspirone hydrochloride tablets 10mg                          | buspirone hydrochloride                     | 4010200 |
| 5176002                                    | BUSPAR tablets 10mg [BRISTOL]                                 | buspirone hydrochloride<br>chlordiazepoxide | 4010200 |
| 6225001                                    | chlordiazepoxide hydrochloride tablets 5mg                    | chlordiazepoxide<br>hydrochloride           | 4010200 |
| 967001                                     | TRANXENE capsules 7.5mg [BOEH INGL]                           | dipotassium clorazepate                     | 4010200 |
| 967002                                     | TRANXENE capsules 15mg [BOEH INGL]                            | dipotassium clorazepate                     | 4010200 |
| 3372002                                    | clorazepate dipotassium capsules 15mg                         | dipotassium clorazepate                     | 4010200 |
| TRICYCLIC AND RELATED ANTIDEPRESSANT DRUGS |                                                               |                                             |         |
| 1873002                                    | PROTHIADEN tablets 75mg [TEOFARMA]                            | dosulepin hydrochloride                     | 4030100 |
| 4000001                                    | lofepramine tablets 70mg                                      | lofepramine                                 | 4030100 |
| 1867001                                    | GAMANIL tablets 70mg [MERCK]                                  | lofepramine                                 | 4030100 |
| 4857001                                    | trazodone capsules 50mg                                       | trazodone hydrochloride                     | 4030100 |
| 1873001                                    | PROTHIADEN capsules 25mg [TEOFARMA]                           | dosulepin hydrochloride                     | 4030100 |
| 3688002                                    | dosulepin tablets 75mg                                        | dosulepin hydrochloride                     | 4030100 |
| 3688001                                    | dosulepin capsules 25mg                                       | dosulepin hydrochloride                     | 4030100 |
| 1855002                                    | ANAFRANIL capsules 25mg [NOVARTIS]                            | clomipramine hydrochloride                  | 4030100 |
| 3074003                                    | amitriptyline hydrochloride modified release<br>capsules 75mg | amitriptyline hydrochloride                 | 4030100 |
| 3691001                                    | doxepin capsules 10mg                                         | doxepin hydrochloride                       | 4030100 |
| 3359002                                    | clomipramine capsules 25mg                                    | clomipramine hydrochloride                  | 4030100 |
| 3359003                                    | clomipramine capsules 50mg                                    | clomipramine hydrochloride                  | 4030100 |

|         |                                                            |                             |         |
|---------|------------------------------------------------------------|-----------------------------|---------|
| 1855003 | ANAFRANIL capsules 50mg [NOVARTIS]                         | clomipramine hydrochloride  | 4030100 |
| 3074001 | amitriptyline hydrochloride modified release capsules 25mg | amitriptyline hydrochloride | 4030100 |
| 117003  | BOLVIDON tablets 30mg [ORGANON]                            | mianserin hydrochloride     | 4030100 |
| 661003  | NORVAL tablets 30mg [BENCARD]                              | mianserin hydrochloride     | 4030100 |
| 1513003 | MOLIPAXIN tablets 150mg [AVENTIS]                          | trazodone hydrochloride     | 4030100 |
| 1855001 | ANAFRANIL capsules 10mg [NOVARTIS]                         | clomipramine hydrochloride  | 4030100 |
| 3691002 | doxepin capsules 25mg                                      | doxepin hydrochloride       | 4030100 |
| 1863002 | SURMONTIL tablets 25mg [AVENTIS]                           | trimipramine maleate        | 4030100 |
| 1863003 | SURMONTIL capsules 50mg [AVENTIS]                          | trimipramine maleate        | 4030100 |
| 4857003 | trazodone tablets 150mg                                    | trazodone hydrochloride     | 4030100 |
| 4857002 | trazodone capsules 100mg                                   | trazodone hydrochloride     | 4030100 |
| 3359001 | clomipramine capsules 10mg                                 | clomipramine hydrochloride  | 4030100 |
| 4190001 | mianserin tablets 10mg                                     | mianserin hydrochloride     | 4030100 |
| 1513001 | MOLIPAXIN capsules 50mg [AVENTIS]                          | trazodone hydrochloride     | 4030100 |
| 2181001 | DOTHAPAX capsules 25mg [ASHBOURNE]                         | dosulepin hydrochloride     | 4030100 |
| 1865001 | EVADYNE tablets 25mg [WYETH PHAR]                          | butriptyline hydrochloride  | 4030100 |
| 4892002 | trimipramine maleate tablets 25mg                          | trimipramine maleate        | 4030100 |
| 1851002 | LUDIOMIL tablets 25mg [NOV/CIBA]                           | maprotiline hydrochloride   | 4030100 |
| 3692001 | doxepin capsules 75mg                                      | doxepin hydrochloride       | 4030100 |
| 4190003 | mianserin tablets 30mg                                     | mianserin hydrochloride     | 4030100 |
| 1875003 | SINEQUAN capsules 50mg [PFIZER]                            | doxepin hydrochloride       | 4030100 |
| 1851001 | LUDIOMIL tablets 10mg [NOV/CIBA]                           | maprotiline hydrochloride   | 4030100 |
| 2277002 | PREPADINE tablets 75mg [BERK]                              | dosulepin hydrochloride     | 4030100 |
| 4892003 | trimipramine maleate capsules 50mg                         | trimipramine maleate        | 4030100 |
| 1852001 | LUDIOMIL tablets 75mg [NOV/CIBA]                           | maprotiline hydrochloride   | 4030100 |
| 2365001 | MOTIVAL tablets [SANOFI S]                                 | Oral                        |         |
| 1513002 | MOLIPAXIN capsules 100mg [AVENTIS]                         | trazodone hydrochloride     | 4030100 |
| 3074002 | amitriptyline hydrochloride modified release capsules 50mg | amitriptyline hydrochloride | 4030100 |
| 2181002 | DOTHAPAX tablets 75mg [ASHBOURNE]                          | dosulepin hydrochloride     | 4030100 |
| 3691003 | doxepin capsules 50mg                                      | doxepin hydrochloride       | 4030100 |

|                                           |                                                                 |                                              |         |
|-------------------------------------------|-----------------------------------------------------------------|----------------------------------------------|---------|
| 4858001                                   | trazodone sugar free oral solution 50mg/5ml                     | trazodone hydrochloride                      | 4030100 |
| 3361001                                   | clomipramine modified release tablet 75mg                       | clomipramine hydrochloride                   | 4030100 |
| 5994002                                   | amoxapine tablets 50mg                                          | amoxapine                                    | 4030100 |
| 1875002                                   | SINEQUAN capsules 25mg [PFIZER]                                 | doxepin hydrochloride                        | 4030100 |
| 1857001                                   | ANAFRANIL SR tablets 75mg [NOVARTIS]                            | clomipramine hydrochloride                   | 4030100 |
| 4190002                                   | mianserin tablets 20mg                                          | mianserin hydrochloride                      | 4030100 |
| 5990002                                   | ASENDIS tablets 50mg [WYETH PHAR]                               | amoxapine                                    | 4030100 |
| 5990003                                   | ASENDIS tablets 100mg [WYETH PHAR]                              | amoxapine<br>fluphenazine                    | 4030100 |
| 5369001                                   | nortriptyline with fluphenazine tablets 10mg +<br>500micrograms | hydrochloride/nortriptyline<br>hydrochloride | 4030100 |
| 1861002                                   | LENTIZOL capsules 50mg [PFIZER]                                 | amitriptyline hydrochloride                  | 4030100 |
| MONOAMINE-OXIDASE INHIBITORS              |                                                                 |                                              |         |
| 6250001                                   | moclobemide tablets 150mg                                       | moclobemide                                  | 4030200 |
| 6240001                                   | MANERIX tablets 150mg [ROCHE]                                   | moclobemide                                  | 4030200 |
| SELECTIVE SEROTONIN RE-UP TAKE INHIBITORS |                                                                 |                                              |         |
| 8619001                                   | citalopram tablets 20mg                                         | citalopram hydrobromide                      | 4030300 |
| 5552001                                   | fluoxetine capsules 20mg                                        | fluoxetine hydrochloride                     | 4030300 |
| 6509001                                   | paroxetine tablets 20mg                                         | paroxetine hydrochloride                     | 4030300 |
| 5509001                                   | PROZAC capsules 20mg [LILLY]                                    | fluoxetine hydrochloride                     | 4030300 |
| 8619002                                   | citalopram tablets 10mg                                         | citalopram hydrobromide                      | 4030300 |
| 6826001                                   | sertraline tablets 50mg                                         | sertraline hydrochloride                     | 4030300 |
| 5552002                                   | fluoxetine oral solution 20mg/5ml                               | fluoxetine hydrochloride                     | 4030300 |
| 8604002                                   | CIPRAMIL tablets 10mg [LUNDBECK]                                | citalopram hydrobromide                      | 4030300 |
| 3507002                                   | FAVERIN tablets 100mg [SOLVAY]                                  | fluvoxamine maleate                          | 4030300 |
| 6509002                                   | paroxetine tablets 30mg                                         | paroxetine hydrochloride                     | 4030300 |
| 6510002                                   | SEROXAT tablets 30mg [GLAXSK PHA]                               | paroxetine hydrochloride                     | 4030300 |
| 6510001                                   | SEROXAT tablets 20mg [GLAXSK PHA]                               | paroxetine hydrochloride                     | 4030300 |
| 5552003                                   | fluoxetine capsules 60mg                                        | fluoxetine hydrochloride                     | 4030300 |
| 8604001                                   | CIPRAMIL tablets 20mg [LUNDBECK]                                | citalopram hydrobromide                      | 4030300 |
| 6825001                                   | LUSTRAL tablets 50mg [PFIZER]                                   | sertraline hydrochloride                     | 4030300 |
| 6510003                                   | SEROXAT sugar-free suspension 20mg/10ml                         | paroxetine hydrochloride                     | 4030300 |



[GLAXSK PHA]

|                            |                                                        |                             |         |
|----------------------------|--------------------------------------------------------|-----------------------------|---------|
| 8619003                    | citalopram tablets 40mg                                | citalopram hydrobromide     | 4030300 |
| 8328001                    | escitalopram tablets 10mg                              | escitalopram oxalate        | 4030300 |
| 8604003                    | CIPRAMIL tablets 40mg [LUNDBECK]                       | citalopram hydrobromide     | 4030300 |
| 1438001                    | escitalopram tablets 20mg                              | escitalopram oxalate        | 4030300 |
| 3507001                    | FAVERIN tablets 50mg [SOLVAY]                          | fluvoxamine maleate         | 4030300 |
| 6826002                    | sertraline tablets 100mg                               | sertraline hydrochloride    | 4030300 |
| 6825002                    | LUSTRAL tablets 100mg [PFIZER]                         | sertraline hydrochloride    | 4030300 |
| 6509003                    | paroxetine sugar-free suspension 20mg/10ml             | paroxetine hydrochloride    | 4030300 |
| 11714001                   | CIPRALEX tablets 10mg [LUNDBECK]                       | escitalopram oxalate        | 4030300 |
| 3506001                    | fluvoxamine tablets 50mg                               | fluvoxamine maleate         | 4030300 |
| 3506002                    | fluvoxamine tablets 100mg                              | fluvoxamine maleate         | 4030300 |
| 1911001                    | CIPRALEX tablets 20mg [LUNDBECK]                       | escitalopram oxalate        | 4030300 |
| 12336001                   | escitalopram tablets 5mg                               | escitalopram oxalate        | 4030300 |
| 5509002                    | PROZAC liquid 20mg/5ml [LILLY]                         | fluoxetine hydrochloride    | 4030300 |
| 5509003                    | PROZAC capsules 60mg [LILLY]                           | fluoxetine hydrochloride    | 4030300 |
| 12337001                   | CIPRALEX tablets 5mg [LUNDBECK]                        | escitalopram oxalate        | 4030300 |
| OTHER ANTIDEPRESSANT DRUGS |                                                        |                             |         |
| 11284001                   | ZISPIN tablets 30mg [ORGANON]                          | mirtazapine                 | 4030400 |
| 103001                     | EFEXOR tablets 37.5mg [WYETH PHAR]                     | venlafaxine hydrochloride   | 4030400 |
| 11282001                   | mirtazapine tablets 30mg                               | mirtazapine                 | 4030400 |
| 365002                     | FLUANXOL tablets 1mg [LUNDBECK]                        | flupentixol dihydrochloride | 4030400 |
| 1663001                    | venlafaxine tablets 37.5mg                             | venlafaxine hydrochloride   | 4030400 |
| 365001                     | FLUANXOL tablets 0.5mg [LUNDBECK]                      | flupentixol dihydrochloride | 4030400 |
| 103002                     | EFEXOR tablets 75mg [WYETH PHAR]                       | venlafaxine hydrochloride   | 4030400 |
| 1663002                    | venlafaxine tablets 75mg                               | venlafaxine hydrochloride   | 4030400 |
| 11223002                   | venlafaxine modified release capsules 150mg            | venlafaxine hydrochloride   | 4030400 |
| 11163001                   | EDRONAX tablets 4mg [PHARMACIA]                        | reboxetine mesilate         | 4030400 |
| 11244001                   | EFEXOR XL modified release capsules 75mg [WYETH PHAR]  | venlafaxine hydrochloride   | 4030400 |
| 11244002                   | EFEXOR XL modified release capsules 150mg [WYETH PHAR] | venlafaxine hydrochloride   | 4030400 |

|                                                                                                                   |                                            |                               |                            |
|-------------------------------------------------------------------------------------------------------------------|--------------------------------------------|-------------------------------|----------------------------|
| 11161001                                                                                                          | reboxetine tablets 4mg                     | reboxetine mesilate           | 4030400                    |
| 3495001                                                                                                           | flupentixol tablets 500 micrograms         | flupentixol dihydrochloride   | 4030400                    |
| 11223001                                                                                                          | venlafaxine modified release capsules 75mg | venlafaxine hydrochloride     | 4030400                    |
| 3495002                                                                                                           | flupentixol tablets 1mg                    | flupentixol dihydrochloride   | 4030400                    |
| 8637002                                                                                                           | DUTONIN tablets 200mg [BMS]                | nefazodone hydrochloride      | 4030400                    |
| 13018001                                                                                                          | mirtazapine tablets 45mg                   | mirtazapine                   | 4030400                    |
| 13017001                                                                                                          | mirtazapine tablets 15mg                   | mirtazapine                   | 4030400                    |
| 12312001                                                                                                          | mirtazapine orodispersible tablet 15mg     | mirtazapine                   | 4030400                    |
| 4900001                                                                                                           | tryptophan tablets 500mg                   | tryptophan                    | 4030400                    |
| 8638001                                                                                                           | nefazodone tablets 100mg                   | nefazodone hydrochloride      | 4030400                    |
| 12053001                                                                                                          | mirtazapine orodispersible tablet 30mg     | mirtazapine                   | 4030400                    |
| 8638002                                                                                                           | nefazodone tablets 200mg                   | nefazodone hydrochloride      | 4030400                    |
| 1663003                                                                                                           | venlafaxine tablets 50mg                   | venlafaxine hydrochloride     | 4030400                    |
| 12313001                                                                                                          | mirtazapine orodispersible tablet 45mg     | mirtazapine                   | 4030400                    |
| SEDATING ANTIHISTAMINES/HYPNOTICS                                                                                 |                                            |                               |                            |
| 6987001                                                                                                           | diphenhydramine tablets 25mg               | diphenhydramine hydrochloride | 03040102/04010100          |
| 6987003                                                                                                           | diphenhydramine tablets 50mg               | diphenhydramine hydrochloride | 03040102/04010100          |
| 744001                                                                                                            | PHENERGAN tablets 10mg [AVENTIS]           | promethazine hydrochloride    | 03040102/04010100/04060000 |
| 744002                                                                                                            | PHENERGAN tablets 25mg [AVENTIS]           | promethazine hydrochloride    | 03040102/04010100/04060000 |
| 4616002                                                                                                           | promethazine hydrochloride tablets 25mg    | promethazine hydrochloride    | 03040102/04010100/04060000 |
| 4616001                                                                                                           | promethazine hydrochloride tablets 10mg    | promethazine hydrochloride    | 03040102/04010100/04060000 |
| 744003                                                                                                            | PHENERGAN elixir 5mg/5ml [AVENTIS]         | promethazine hydrochloride    | 03040102/04010100/04060000 |
| 6297001                                                                                                           | promethazine hydrochloride elixir 5mg/5ml  | promethazine hydrochloride    | 03040102/04010100/04060000 |
| SEDATING ANTIHISTAMINES/ANXIOLYTICS                                                                               |                                            |                               |                            |
| 3809002                                                                                                           | hydroxyzine tablets 25mg                   | hydroxyzine hydrochloride     | 03040102/04010200          |
| 3809001                                                                                                           | hydroxyzine tablets 10mg                   | hydroxyzine hydrochloride     | 03040102/04010200          |
| 64001                                                                                                             | ATARAX tablets 10mg [PFIZER]               | hydroxyzine hydrochloride     | 03040102/04010200          |
| 64002                                                                                                             | ATARAX tablets 25mg [PFIZER]               | hydroxyzine hydrochloride     | 03040102/04010200          |
| HYPNOTICS/ANXIOLYTICS/CONTROL OF EPILEPSY/SKELETAL MUSCLE RELAXANTS/ANXIOLYTICS AND NEUROLEPTICS (IN ANAESTHESIA) |                                            |                               |                            |

|                                                                                                                                          |                                                                               |               |                                              |
|------------------------------------------------------------------------------------------------------------------------------------------|-------------------------------------------------------------------------------|---------------|----------------------------------------------|
| 2783002                                                                                                                                  | diazepam tablets 5mg                                                          | diazepam      | 04010100/04010200/04080100/10020200/15010401 |
| 2783001                                                                                                                                  | diazepam tablets 2mg                                                          | diazepam      | 04010100/04010200/04080100/10020200/15010401 |
| 2783003                                                                                                                                  | diazepam tablets 10mg                                                         | diazepam      | 04010100/04010200/04080100/10020200/15010401 |
| 3590002                                                                                                                                  | diazepam capsules 2mg                                                         | diazepam      | 04010100/04010200/04080100/10020200/15010401 |
| 3590003                                                                                                                                  | diazepam capsules 5mg                                                         | diazepam      | 04010100/04010200/04080100/10020200/15010401 |
| 2784001                                                                                                                                  | diazepam elixir 2mg/5ml                                                       | diazepam      | 04010100/04010200/04080100/10020200/15010401 |
| HYPNOTICS/ALCOHOL DEPENDENCE                                                                                                             |                                                                               |               |                                              |
| 3293001                                                                                                                                  | clomethiazole capsules 192mg<br>HEMINEVRIN capsules 192mg                     | clomethiazole | 04010100/04100100                            |
| 431001                                                                                                                                   | [ASTRAZENECA]                                                                 | clomethiazole | 04010100/04100100                            |
| HYPNOTICS/ANXIOLYTICS AND NEUROLEPTICS (IN ANAESTHESIA)                                                                                  |                                                                               |               |                                              |
| 4784001                                                                                                                                  | temazepam capsules 10mg                                                       | temazepam     | 04010100/15010401                            |
| 5188002                                                                                                                                  | temazepam tablets 10mg                                                        | temazepam     | 04010100/15010401                            |
| 5188003                                                                                                                                  | temazepam tablets 20mg                                                        | temazepam     | 04010100/15010401                            |
| 4784002                                                                                                                                  | temazepam capsules 20mg                                                       | temazepam     | 04010100/15010401                            |
| 5779001                                                                                                                                  | TEMAZEPAM PLANPAK capsules [??]                                               | temazepam     | 04010100/15010401                            |
| 5188001                                                                                                                                  | temazepam sugar free elixir 10mg/5ml                                          | temazepam     | 04010100/15010401                            |
| 4784003                                                                                                                                  | temazepam capsules 15mg                                                       | temazepam     | 04010100/15010401                            |
| HYPNOTICS/UNLICENSED PRODUCT                                                                                                             |                                                                               |               |                                              |
| 8196001                                                                                                                                  | melatonin capsules 3mg                                                        | melatonin     | 04010100/23010000                            |
| ANXIOLYTICS/CONTROL OF EPILEPSY                                                                                                          |                                                                               |               |                                              |
| 3351001                                                                                                                                  | clobazam capsules 10mg                                                        | clobazam      | 04010200/04080100                            |
| 3351002                                                                                                                                  | clobazam tablets 10mg                                                         | clobazam      | 04010200/04080100                            |
| 377001                                                                                                                                   | FRISIUM capsules 10mg [AVENTIS]                                               | clobazam      | 04010200/04080100                            |
| ANXIOLYTICS/DRUGS USED IN STATUS EPILEPTICUS/SKELETAL MUSCLE RELAXANTS/ANXIOLYTICS AND NEUROLEPTICS (IN ANAESTHESIA)/FEBRILE CONVULSIONS |                                                                               |               |                                              |
| 2466002                                                                                                                                  | STESOLID rectal tubes 10mg [ACTAVIS]                                          | diazepam      | 04010200/04080200/10020200/15010401/04080300 |
| 2466001                                                                                                                                  | STESOLID rectal tubes 5mg [ACTAVIS]<br>DIAZEPAM RECTUBES rectal tubes 5mg [CP | diazepam      | 04010200/04080200/10020200/15010401/04080300 |
| 294001                                                                                                                                   | PHARM]                                                                        | diazepam      | 04010200/04080200/10020200/15010401/04080300 |
| 3592002                                                                                                                                  | diazepam rectal tubes 10mg<br>DIAZEPAM RECTUBES rectal tubes 10mg             | diazepam      | 04010200/04080200/10020200/15010401/04080300 |
| 294002                                                                                                                                   | [CP PHARM]                                                                    | diazepam      | 04010200/04080200/10020200/15010401/04080300 |

|                                                                                                                                                                                  |                                                                     |                                             |                                              |
|----------------------------------------------------------------------------------------------------------------------------------------------------------------------------------|---------------------------------------------------------------------|---------------------------------------------|----------------------------------------------|
| 3591002                                                                                                                                                                          | diazepam suppository 10mg                                           | diazepam                                    | 04010200/04080200/10020200/15010401/04080300 |
| 3592001                                                                                                                                                                          | diazepam rectal tubes 5mg                                           | diazepam                                    | 04010200/04080200/10020200/15010401/04080300 |
| ANXIOLYTICS/SKELETAL MUSCLE RELAXANTS                                                                                                                                            |                                                                     |                                             |                                              |
| 4101002                                                                                                                                                                          | meprobamate tablets 400mg                                           | meprobamate                                 | 04010200/10020200                            |
| 4101001                                                                                                                                                                          | meprobamate tablets 200mg                                           | meprobamate                                 | 04010200/10020200                            |
| 3296001                                                                                                                                                                          | chlormezanone tablets 200mg                                         | chlormezanone                               | 04010200/10020200                            |
| 2786001                                                                                                                                                                          | lorazepam tablets 1mg                                               | lorazepam                                   | 04010200/15010401                            |
| 2786002                                                                                                                                                                          | lorazepam tablets 2.5mg                                             | lorazepam                                   | 04010200/15010401                            |
| ANTIPSYCHOTIC DRUGS/TRICYCLIC AND RELATED ANTIDEPRESSANT DRUGS                                                                                                                   |                                                                     |                                             |                                              |
| 982002                                                                                                                                                                           | TRIPTAFEN M tablets 2mg + 10mg<br>[GOLDSHIELD]                      | amitriptyline<br>hydrochloride/perphenazine | 04020100/04030100                            |
| 982001                                                                                                                                                                           | TRIPTAFEN tablets 2mg + 25mg<br>[GOLDSHIELD]                        | amitriptyline<br>hydrochloride/perphenazine | 04020100/04030100                            |
| 5296002                                                                                                                                                                          | amitriptyline hydrochloride with perphenazine<br>tablets 25mg + 2mg | amitriptyline<br>hydrochloride/perphenazine | 04020100/04030100                            |
| 719001                                                                                                                                                                           | PARSTELIN tablets [GLAXSK CON]                                      |                                             |                                              |
| TRICYCLIC AND RELATED ANTIDEPRESSANT DRUGS/NEUROPATHIC PAIN/PROPHYLAXIS OF MIGRAINE/DRUGS FOR URINARY FREQUENCY, ENURESIS & INCONTINENCE                                         |                                                                     |                                             |                                              |
| 2776002                                                                                                                                                                          | amitriptyline hydrochloride tablets 25mg                            | amitriptyline hydrochloride                 | 04030100/04070300/04070402/07040200          |
| 2776003                                                                                                                                                                          | amitriptyline hydrochloride tablets 50mg                            | amitriptyline hydrochloride                 | 04030100/04070300/04070402/07040200          |
| 2776001                                                                                                                                                                          | amitriptyline hydrochloride tablets 10mg                            | amitriptyline hydrochloride                 | 04030100/04070300/04070402/07040200          |
| 1869002                                                                                                                                                                          | TRYPTIZOL tablets 25mg [M S D]                                      | amitriptyline hydrochloride                 | 04030100/04070300/04070402/07040200          |
| 1869001                                                                                                                                                                          | TRYPTIZOL tablets 10mg [M S D]                                      | amitriptyline hydrochloride                 | 04030100/04070300/04070402/07040200          |
| 1869003                                                                                                                                                                          | TRYPTIZOL tablets 50mg [M S D]                                      | amitriptyline hydrochloride                 | 04030100/04070300/04070402/07040200          |
| TRICYCLIC AND RELATED ANTIDEPRESSANT DRUGS/NEUROPATHIC PAIN/PROPHYLAXIS OF MIGRAINE/DRUGS FOR URINARY FREQUENCY, ENURESIS & INCONTINENCE/UNLICENSED MEDICINAL PRODUCT (SPECIALS) |                                                                     |                                             |                                              |
| 1871001                                                                                                                                                                          | TRYPTIZOL sugar free mixture 10mg/5ml [M<br>S D]                    | amitriptyline hydrochloride                 | 04030100/04070300/04070402/07040200/23000000 |
| 7191003                                                                                                                                                                          | amitriptyline hydrochloride sugar free oral<br>solution 10mg/5ml    | amitriptyline hydrochloride                 | 04030100/04070300/04070402/07040200/23000000 |
| TRICYCLIC AND RELATED ANTIDEPRESSANT DRUGS/NEUROPATHIC PAIN/DRUGS FOR URINARY FREQUENCY, ENURESIS & INCONTINENCE                                                                 |                                                                     |                                             |                                              |
| 4303001                                                                                                                                                                          | nortriptyline tablets 10mg                                          | nortriptyline hydrochloride                 | 04030100/04070300/07040200                   |
| 4304002                                                                                                                                                                          | nortriptyline capsules 25mg                                         | nortriptyline hydrochloride                 | 04030100/04070300/07040200                   |

|                                                                                                                                  |                                                    |                          |                            |
|----------------------------------------------------------------------------------------------------------------------------------|----------------------------------------------------|--------------------------|----------------------------|
| 2887001                                                                                                                          | imipramine tablets 10mg                            | imipramine hydrochloride | 04030100/07040200          |
| 1859002                                                                                                                          | TOFRANIL tablets 25mg [NOVARTIS]                   | imipramine hydrochloride | 04030100/07040200          |
| 2887002                                                                                                                          | imipramine tablets 25mg                            | imipramine hydrochloride | 04030100/07040200          |
| 1859003                                                                                                                          | TOFRANIL syrup 25mg/5ml [NOVARTIS]                 | imipramine hydrochloride | 04030100/07040200          |
| OTHER ANTIDEPRESSANT DRUGS/DRUGS FOR URINARY FREQUENCY, ENURESIS & INCONTINENCE/TREATMENT OF DIABETIC NEPHROPATHY AND NEUROPATHY |                                                    |                          |                            |
| 12664001                                                                                                                         | YENTREVE gastro-resistant capsules 20mg<br>[LILLY] | duloxetine hydrochloride | 04030400/07040200/06010500 |
| 13003001                                                                                                                         | CYMBALTA gastro-resistant capsules 60mg<br>[LILLY] | duloxetine hydrochloride | 04030400/07040200/06010500 |
| 13001001                                                                                                                         | duloxetine gastro-resistant capsules 60mg          | duloxetine hydrochloride | 04030400/07040200/06010500 |
